# Supplementary material for: Catalytic properties of group 4 transition metal dichalcogenides (MX2; M = Ti, Zr, Hf; X = S, Se, Te)
Source: Royal Society of Chemistry journal article supplement (doi:10.1039/c6ta08089h), 2016-01-01
Supplement: c6ta08089h1.pdf [file c6ta08089h1.pdf]

SUPPLEMENTARY INFORMATION

FOR

**Catalytic Properties of Group 4 Transition Metal Dichalcogenides ( $\text{MX}_2$ , M = Ti, Zr, Hf; X = S,  
Se, Te)**

Rou Jun Toh,<sup>a</sup> Zdenek Sofer<sup>b</sup> and Martin Pumera<sup>a\*</sup>

*<sup>a</sup>Division of Chemistry & Biological Chemistry School of Physical and Mathematical  
Sciences, Nanyang Technological University, 637371, Singapore.*

*<sup>b</sup>Department of Inorganic Chemistry, University of Chemistry and Technology Prague,  
Technická 5, 166 28 Prague 6, Czech Republic*

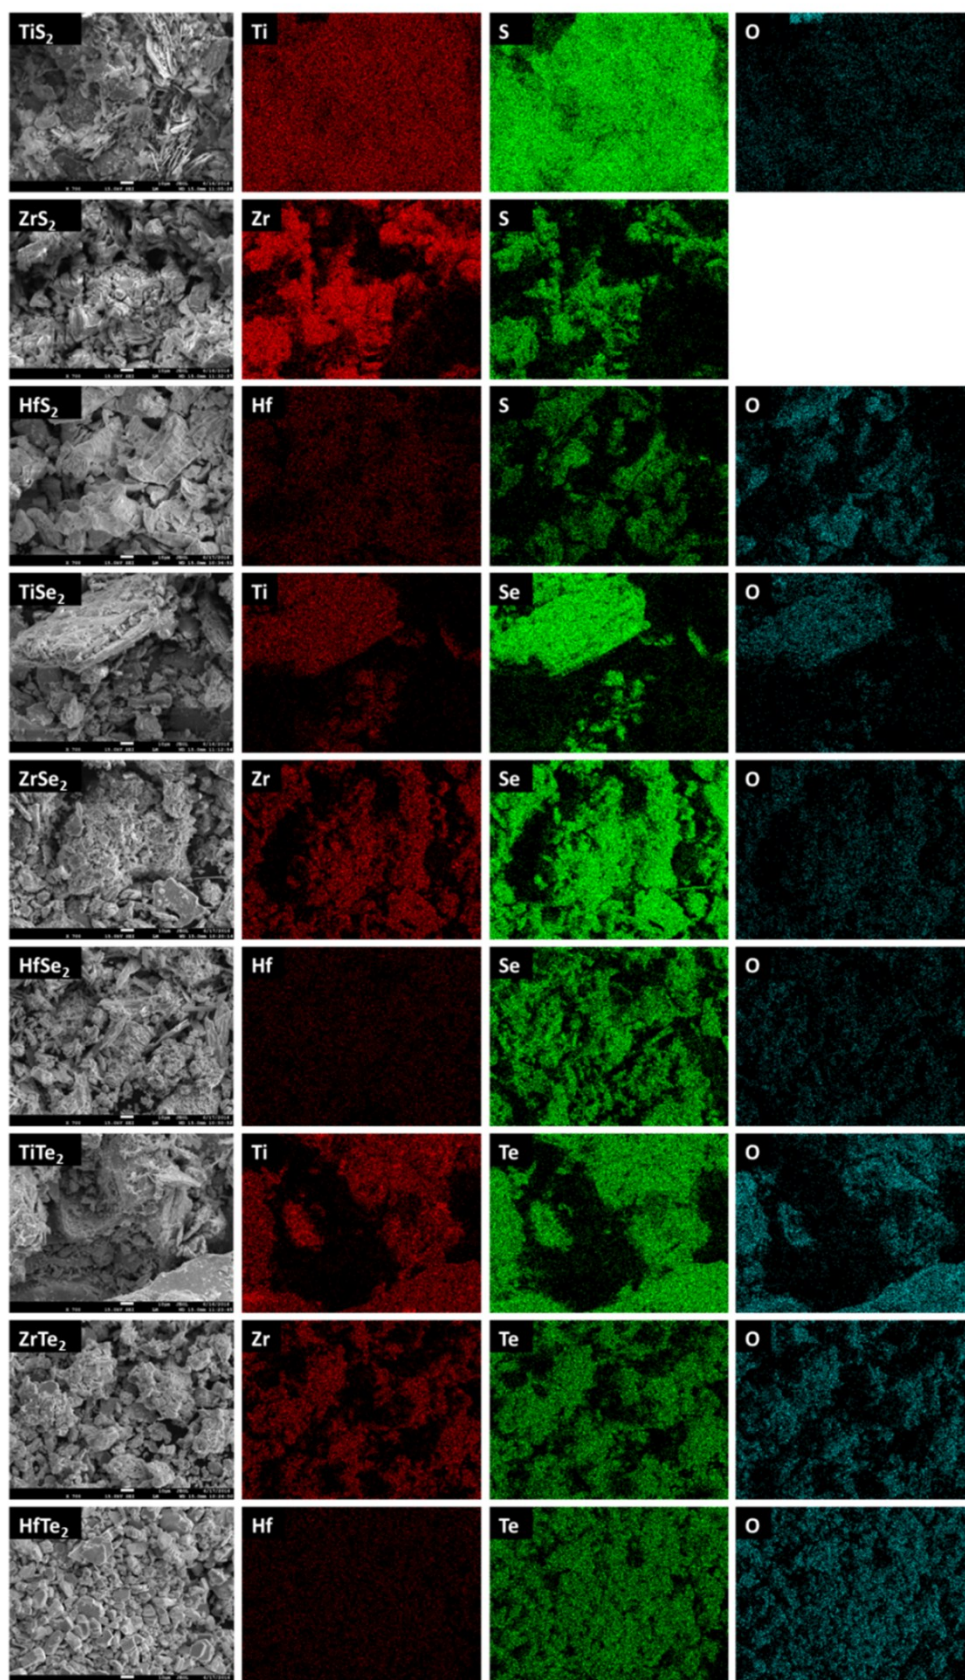

**Figure S1.** Scanning electron micrographs and corresponding energy-dispersive X-ray maps of group 4 TMDs. Scale bars represent 10 μm.

| Material          | Ti<br>at. % | Zr<br>at. % | Hf<br>at. % | S<br>at. % | Se<br>at. % | Te<br>at. % | C<br>at. % | O<br>at. % | Al<br>at. % | Si<br>at. % |
|-------------------|-------------|-------------|-------------|------------|-------------|-------------|------------|------------|-------------|-------------|
| TiS <sub>2</sub>  | 27.19       | -           | -           | 41.07      | -           | -           | 14.23      | 16.95      | 0.32        | 0.24        |
| ZrS <sub>2</sub>  | -           | 27.00       | -           | 29.47      | -           | -           | 28.70      | 14.43      | 0.39        | -           |
| HfS <sub>2</sub>  | -           | -           | 20.22       | 15.76      | -           | -           | 23.06      | 40.97      | -           | -           |
| TiSe <sub>2</sub> | 17.06       | -           | -           | -          | 25.55       | -           | 19.21      | 36.36      | -           | 1.82        |
| ZrSe <sub>2</sub> | -           | 9.91        | -           | -          | 21.40       | -           | 50.94      | 17.75      | -           | -           |
| HfSe <sub>2</sub> | -           | -           | 10.34       | -          | 20.61       | -           | 47.35      | 21.70      | -           | -           |
| TiTe <sub>2</sub> | 23.30       | -           | -           | -          | -           | 34.65       | -          | 41.08      | 0.98        | -           |
| ZrTe <sub>2</sub> | -           | 12.66       | -           | -          | -           | 30.30       | 19.15      | 37.88      | -           | -           |
| HfTe <sub>2</sub> | -           | -           | 11.25       | -          | -           | 25.34       | 23.96      | 39.45      | -           | -           |

**Figure S2.** Elemental compositions of group 4 TMD materials based on energy-dispersive X-ray spectroscopy.

| Material          | Surface Chalcogen / Metal Ratio  |                           |                           |
|-------------------|----------------------------------|---------------------------|---------------------------|
|                   | Before electrochemical treatment | After reductive treatment | After oxidative treatment |
| TiS <sub>2</sub>  | 1.41                             | Loss of TiS <sub>2</sub>  | Loss of TiS <sub>2</sub>  |
| ZrS <sub>2</sub>  | 0.77                             | Loss of ZrS <sub>2</sub>  | -                         |
| HfS <sub>2</sub>  | 0.43                             | -                         | -                         |
| TiSe <sub>2</sub> | 1.67                             | Loss of TiSe <sub>2</sub> | Loss of TiSe <sub>2</sub> |
| ZrSe <sub>2</sub> | 0.88                             | Loss of ZrSe <sub>2</sub> | Loss of ZrSe <sub>2</sub> |
| HfSe <sub>2</sub> | 0.80                             | 1.15                      | 0.99                      |
| TiTe <sub>2</sub> | 3.78                             | Loss of TiTe <sub>2</sub> | Loss of TiTe <sub>2</sub> |
| ZrTe <sub>2</sub> | 5.08                             | Loss of ZrTe <sub>2</sub> | Loss of ZrTe <sub>2</sub> |
| HfTe <sub>2</sub> | 4.16                             | Loss of HfTe <sub>2</sub> | Loss of HfTe <sub>2</sub> |

**Figure S3.** Tabulated chalcogen-to-metal ratios of group 4 TMD materials before and electrochemical treatments based on high resolution X-ray photoelectron spectroscopy.

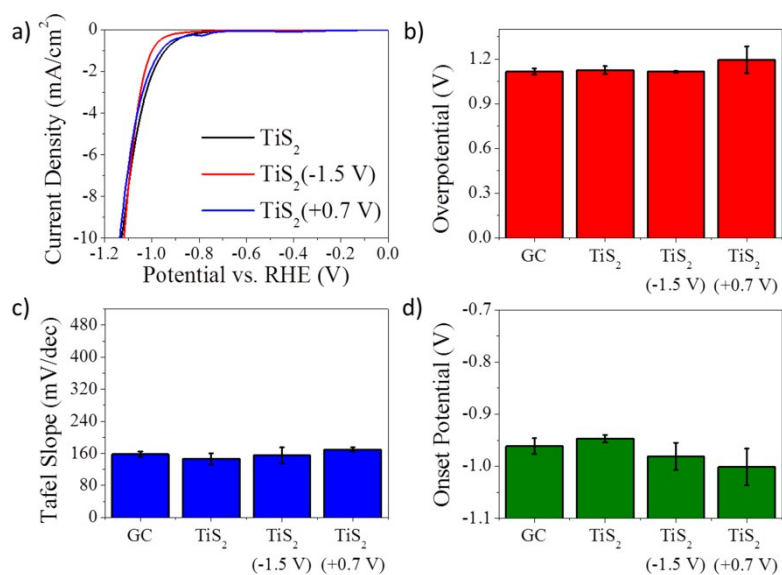

**Figure S4.** The effect of electrochemical treatment on HER performance of TiS<sub>2</sub>. (a) Linear sweep voltammograms for HER in acidic electrolyte on TiS<sub>2</sub> (black line), TiS<sub>2</sub> after -1.5 V treatment (red line) and TiS<sub>2</sub> after +0.7 V treatment (blue line) deposited on a GC electrode. Presented in the bar charts are the averages of the (b) overpotential at -10 mA cm<sup>-2</sup> current density, (c) Tafel slopes and (d) HER onset potential, with their corresponding error bars for bare GC and TiS<sub>2</sub> before and after electrochemical treatment.

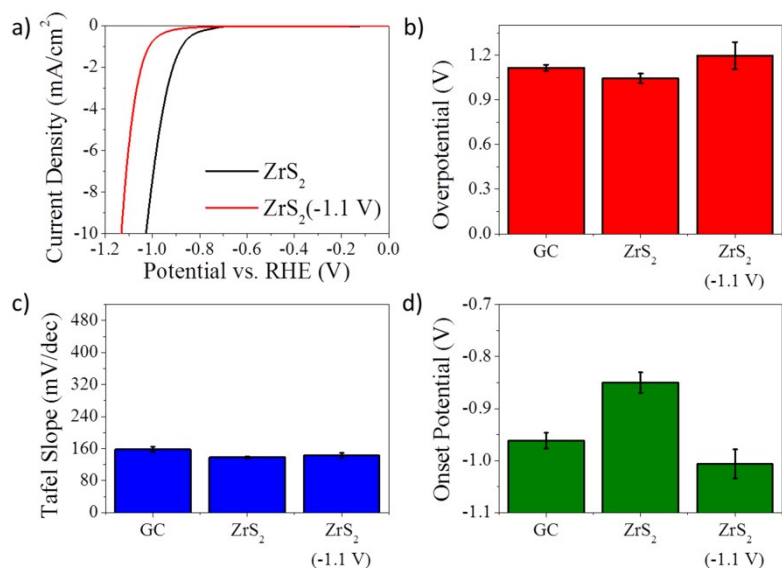

**Figure S5.** The effect of electrochemical treatment on HER performance of ZrS<sub>2</sub>. (a) Linear sweep voltammograms for HER in acidic electrolyte on ZrS<sub>2</sub> (black line) and ZrS<sub>2</sub> after -1.1 V treatment (red line) deposited on a GC electrode. Presented in the bar charts are the averages of the (b) overpotential at -10 mA cm<sup>-2</sup> current density, (c) Tafel slopes and (d) HER onset potential, with their corresponding error bars for bare GC and ZrS<sub>2</sub> before and after electrochemical treatment.

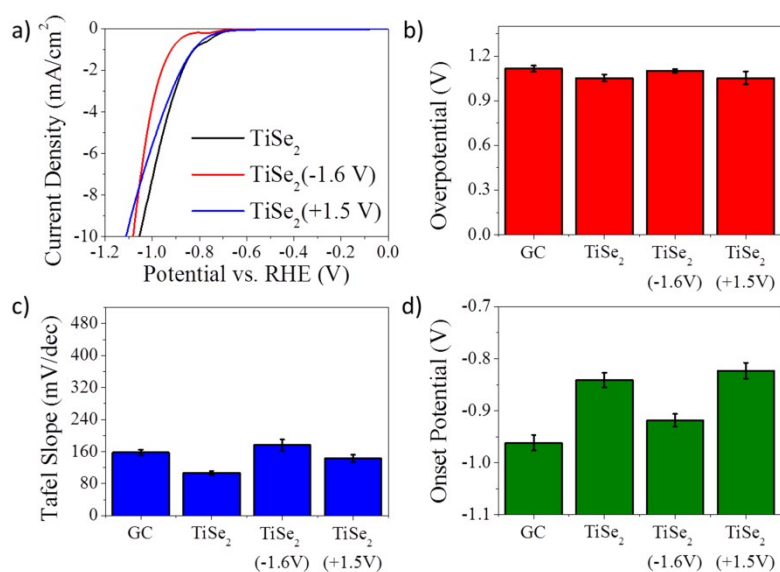

**Figure S6.** The effect of electrochemical treatment on HER performance of TiSe<sub>2</sub>. (a) Linear sweep voltammograms for HER in acidic electrolyte on TiSe<sub>2</sub> (black line), TiSe<sub>2</sub> after -1.6 V treatment (red line) and TiSe<sub>2</sub> after +1.5 V treatment (blue line) deposited on a GC electrode. Presented in the bar charts are the averages of the (b) overpotential at -10 mA cm<sup>-2</sup> current density, (c) Tafel slopes and (d) HER onset potential, with their corresponding error bars for bare GC and TiSe<sub>2</sub> before and after electrochemical treatment.

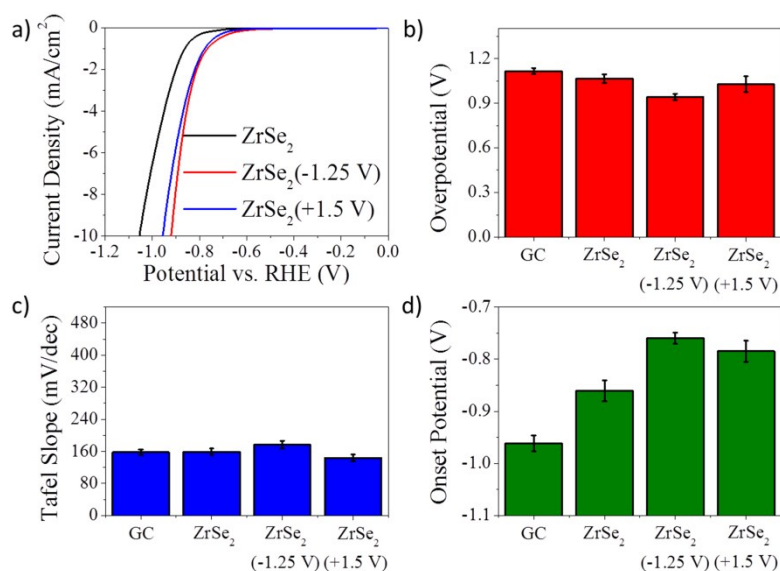

**Figure S7.** The effect of electrochemical treatment on HER performance of ZrSe<sub>2</sub>. (a) Linear sweep voltammograms for HER in acidic electrolyte on ZrSe<sub>2</sub> (black line), ZrSe<sub>2</sub> after -1.25 V treatment (red line) and ZrSe<sub>2</sub> after +1.5 V treatment (blue line) deposited on a GC electrode. Presented in the bar charts are the averages of the (b) overpotential at -10 mA cm<sup>-2</sup> current density, (c) Tafel slopes and (d) HER onset potential, with their corresponding error bars for bare GC and ZrSe<sub>2</sub> before and after electrochemical treatment.

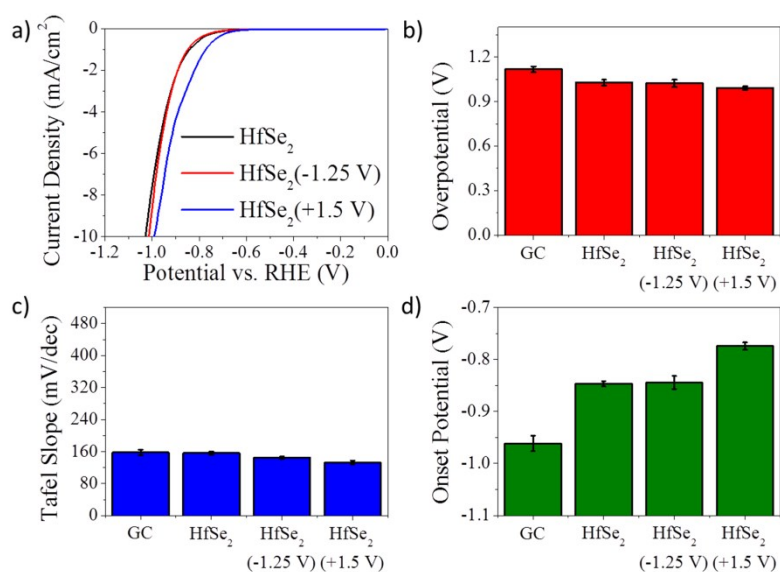

**Figure S8.** The effect of electrochemical treatment on HER performance of HfSe<sub>2</sub>. (a) Linear sweep voltammograms for HER in acidic electrolyte on HfSe<sub>2</sub> (black line), HfSe<sub>2</sub> after -1.25 V treatment (red line) and HfSe<sub>2</sub> after +1.5 V treatment (blue line) deposited on a GC electrode. Presented in the bar charts are the averages of the (b) overpotential at -10 mA cm<sup>-2</sup> current density, (c) Tafel slopes and (d) HER onset potential, with their corresponding error bars for bare GC and HfSe<sub>2</sub> before and after electrochemical treatment.

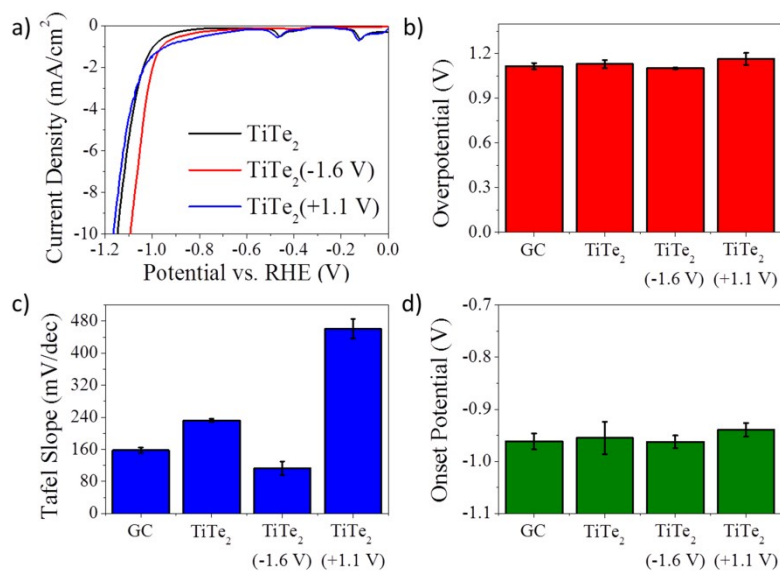

**Figure S9.** The effect of electrochemical treatment on HER performance of TiTe<sub>2</sub>. (a) Linear sweep voltammograms for HER in acidic electrolyte on TiTe<sub>2</sub> (black line), TiTe<sub>2</sub> after -1.6 V treatment (red line) and TiTe<sub>2</sub> after +1.1 V treatment (blue line) deposited on a GC electrode. Presented in the bar charts are the averages of the (b) overpotential at -10 mA cm<sup>-2</sup> current density, (c) Tafel slopes and (d) HER onset potential, with their corresponding error bars for bare GC and TiTe<sub>2</sub> before and after electrochemical treatment.

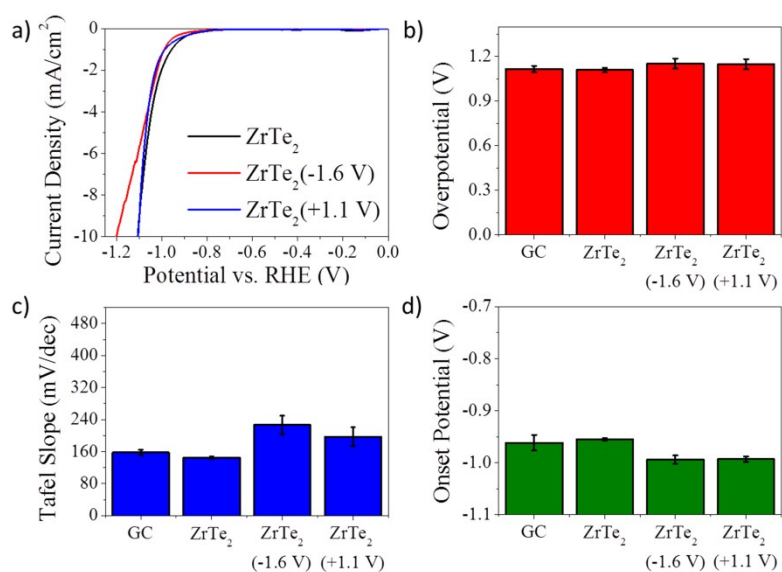

**Figure S10.** The effect of electrochemical treatment on HER performance of ZrTe<sub>2</sub>. (a) Linear sweep voltammograms for HER in acidic electrolyte on ZrTe<sub>2</sub> (black line), ZrTe<sub>2</sub> after -1.6 V treatment (red line) and ZrTe<sub>2</sub> after +1.1 V treatment (blue line) deposited on a GC electrode. Presented in the bar charts are the averages of the (b) overpotential at -10 mA cm<sup>-2</sup> current density, (c) Tafel slopes and (d) HER onset potential, with their corresponding error bars for bare GC and ZrTe<sub>2</sub> before and after electrochemical treatment.

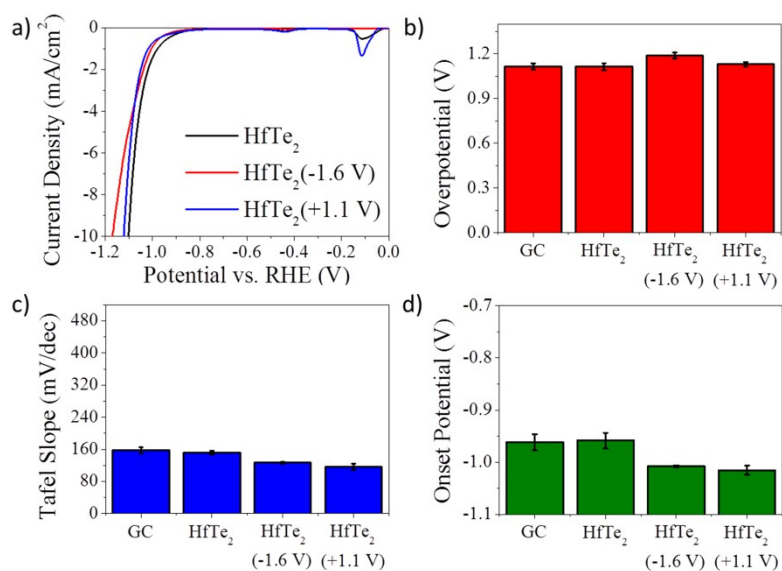

**Figure S11.** The effect of electrochemical treatment on HER performance of HfTe<sub>2</sub>. (a) Linear sweep voltammograms for HER in acidic electrolyte on HfTe<sub>2</sub> (black line), HfTe<sub>2</sub> after -1.6 V treatment (red line) and HfTe<sub>2</sub> after +1.1 V treatment (blue line) deposited on a GC electrode. Presented in the bar charts are the averages of the (b) overpotential at -10 mA cm<sup>-2</sup> current density, (c) Tafel slopes and (d) HER onset potential, with their corresponding error bars for bare GC and HfTe<sub>2</sub> before and after electrochemical treatment.
